# Supplementary material
Source: ML conference proceedings conference paper supplement (https://openreview.net/forum?id=0YYQ_KKsIZ)
Supplement: supplementary_material [file attachment]

## APPENDIX A: PROOF OF THEOREM 1

**Assumption 1.** *There exist positive constants  $\alpha_1, \alpha_2, \alpha_3$  such that for any  $x, y \in \mathbb{R}^n$ ,*

$$\begin{aligned} |h'_1(x) - h'_1(y)| &\leq \alpha_1 \|x - y\|, \quad |h'_2(x) - h'_2(y)| \leq \alpha_2 \|x - y\|, \\ |h'_3(x) - h'_3(y)| &\leq \alpha_3 \|x - y\|. \end{aligned}$$

$$dX(t) = f(X(t))dt + u(t). \quad (1)$$

Under Assumption 1, for any initial value  $X(0) = \xi \in \mathbb{R}^2$ , if  $\varrho_2 \neq 0$  and  $\beta > 1$ , then there a.s. exists a unique global solution  $X(t)$  to system (1) on  $t \in [0, \infty)$ .

*Proof.* Under Assumption 1, then, we can calculate that

$$\begin{aligned} &X^T(t)f(X(t)) \\ &= \phi(t)h'_1(\phi(t)c)c + \phi(t)h'_2(\phi(t)(\tilde{\theta}(t) + c))\tilde{\theta}(t) + \\ &\quad \phi(t)h'_2(\phi(t)(\tilde{\theta}(t) + c))c + \\ &\quad \tilde{\theta}(t)h'_3(\phi(t)(\tilde{\theta}(t) + c))\phi(t) \\ &\leq \left(1 + \frac{1}{2}\alpha_1^2\right)c^2 + 2c + \frac{1}{2}\|X\|^2 + \left(\alpha_2^2 + \frac{1}{2}\alpha_3^2\right)|X|^4. \end{aligned}$$

For any bounded initial value  $X(0) \in \mathbb{R}^n$ , there exists a unique maximal local strong solution  $X(t)$  of system (1) on  $t \in [0, \tau_e)$ , where  $\tau_e$  is the explosion time. To show that the solution is actually global, we only need to prove that  $\tau_e = \infty$  a.s. Let  $k_0$  be a sufficiently large positive number such that  $|X(0)| < k_0$ . For each integer  $k \geq k_0$ , define the stopping time

$$\tau_k = \inf\{t \in [0, \tau_e) : |X(t)| \geq k\}$$

with the traditional setting  $\inf \emptyset = \infty$ , where  $\emptyset$  denotes the empty set. Clearly,  $\tau_k$  is increasing as  $k \rightarrow \infty$  and  $\tau_k \rightarrow \tau_\infty \leq \tau_e$  a.s. If we can show that  $\tau_\infty = \infty$ , then  $\tau_e = \infty$  a.s., which implies the desired result. This is also equivalent to prove that, for any  $t > 0$ ,  $\mathbb{P}(\tau_k \leq t) \rightarrow 0$  as  $k \rightarrow \infty$ . To prove this statement, for any  $p \in (0, 1)$ , define a  $C^2$ -function

$$V(x) = |X(t)|^p.$$

One can obtain that  $X(t) \neq 0$  for all  $0 \leq t \leq \tau_e$  a.s. Thus, one can apply the Itô formula to show that for any  $t \in [0, \tau_e)$ ,

$$\begin{aligned} dV(X(t)) &= LV(X(t))dt + p\varrho_1|X(t)|^p dB_1(t) \\ &\quad + p\varrho_2|X(t)|^{\beta+p} dB_2(t), \end{aligned}$$

where  $LV$  is defined as

$$\begin{aligned} LV(X) &= p|X|^{p-2}X^T f(X(t)) + \frac{p(p-1)\varrho_1^2}{2}|X|^p \\ &\quad + \frac{p(p-1)\varrho_2^2}{2}|X|^{2\beta+p} \end{aligned}$$

By Assumption 1, we therefore have

$$\begin{aligned} LV(X) &\leq \frac{p(p-1)\varrho_2^2}{2}|X|^{2\beta+p} + \left(1 + \frac{1}{2}\alpha_1^2\right)c^2 + 2c + \frac{1}{2} \\ &\quad p|X|^{\alpha+p} + p\left(\frac{(p-1)\varrho_1^2}{2} + \left(\alpha_2^2 + \frac{1}{2}\alpha_3^2\right)\right)|X|^p. \end{aligned}$$

Noting that  $p \in (0, 1)$  and  $\beta > 1$  and  $\varrho_2 \neq 0$ , by the boundedness of polynomial functions, there exists a positive constant  $\bar{H}$  such that  $LV(x) \leq \bar{H}$ . We therefore have

$$\begin{aligned} \mathbb{E}V(X(t \wedge \tau_k)) &\leq \mathbb{E}|\xi|^p + \mathbb{E} \int_0^{t \wedge \tau_k} LV(X(s))ds \\ &\leq \mathbb{E}|\xi|^p + \bar{H}_t \\ &=: \bar{H}_t, \end{aligned}$$

where  $\bar{H}_t$  is independent of  $k$ . By the definition of  $\tau_k$ ,  $|X(\tau_k)| = k$ , so

$$\begin{aligned}\mathbb{P}(\tau_k \leq t)k^p &\leq \mathbb{P}(\tau_k \leq t)V(X(\tau_k)) \\ &\leq \mathbb{E}[l_{\{\tau_k \leq t\}}V(X(t \wedge \tau_k))] \\ &\leq \mathbb{E}V(X(t \wedge \tau_k)) \\ &\leq \bar{H}_t,\end{aligned}$$

which implies that

$$\limsup_{k \rightarrow \infty} \mathbb{P}(\tau_k \leq t) \leq \lim_{k \rightarrow \infty} \frac{\bar{H}_t}{k^p} = 0,$$

as required.  $\square$

## APPENDIX B: PROOF OF THEOREM 2

Let Assumption 1 hold. Assume that  $\varrho_2 \neq 0$  and  $\beta > 1$ . If

$$\frac{\varrho_1^2}{2} - \varphi > 0,$$

where

$$\varphi = \max_{x \geq 0} \left\{ -\frac{\varrho_2^2}{2}x^{2\beta} + (\alpha_2^2 + \frac{1}{2}\alpha_3^2)x^2 + [(1 + \frac{1}{2}\alpha_1^2)c^2 + 2c + \frac{1}{2}] \right\}, \quad (2)$$

then for any  $X(0) = \xi$  with sufficiently small constant  $\epsilon \in (0, \varrho_1^2/2 - \varphi)$ , the global solution  $X(t)$  of system (1) has the property that

$$\limsup_{t \rightarrow \infty} \frac{\log |X(t)|}{t} \leq -\left(\frac{\varrho_1^2}{2} - \varphi\right) + \epsilon, \quad a.s.$$

that is, the solution of system (1) is a.s. exponentially stable.

*Proof.* Applying Itô formula to  $\log |X(t)|$  yields

$$\begin{aligned}\log |X(t)| &= \log |X(0)| + \int_0^t \left[ |X(s)|^{-2} X^T(s) f(X(s)) \right. \\ &\quad \left. - \frac{\varrho_2^2}{2} |X(s)|^{2\beta} - \frac{\varrho_1^2}{2} \right] ds + \int_0^t \varrho_1 dB_1(s) \\ &\quad + \varrho_2 \int_0^t |X(s)|^\beta dB_2(s).\end{aligned}$$

Letting  $M(t) = \varrho_2 \int_0^t |X(s)|^\beta dB_2(s)$ , clearly  $M(t)$  is a continuous local martingale with the quadratic variation

$$\langle M(t), M(t) \rangle = \varrho_2^2 \int_0^t |X(s)|^{2\beta} ds.$$

For any  $\varepsilon \in (0, 1)$ , choose  $\theta > 0$  such that  $\theta\varepsilon > 1$ . Then for each integer  $m > 0$ , the exponential martingale inequality gives

$$\mathbb{P} \left\{ \sup_{1 \leq t \leq m} \left[ M(t) - \frac{\varepsilon \varrho_2^2}{2} \int_0^t |X(s)|^{2\beta} ds \right] \geq \theta\varepsilon \log m \right\} \leq \frac{1}{m^{\theta\varepsilon}}.$$

Since  $\sum_{m=1}^{\infty} m^{-\theta\varepsilon} < \infty$ , by the well-known Borel-Cantelli lemma, there exists an  $\bar{\Omega}_0 \subseteq \Omega$  with  $\mathbb{P}(\bar{\Omega}_0) = 1$  such that for any  $\omega \in \bar{\Omega}_0$ , there exists an integer  $\bar{m}(\omega)$ , when  $m > \bar{m}(\omega)$ , and  $m - 1 \leq t \leq m$ ,

$$M(t) \leq \frac{\varepsilon \varrho_2^2}{2} \int_0^t |X(s)|^{2\beta} ds + \theta\varepsilon \log(t + 1).$$

---

This, together with Assumption 1, yields

$$\begin{aligned}
\log |X(t)| &\leq \log |\xi| + \int_0^t \left[ -\frac{\varrho_2^2(1-\varepsilon)}{2} |X(s)|^{2\beta} \right. \\
&\quad + \left( 1 + \left( \frac{1}{2} \alpha_1^2 \right) c^2 + 2c + \frac{1}{2} \right) |X(s)|^\alpha \\
&\quad + \left( \alpha_2^2 + \frac{1}{2} \alpha_3^2 \right) - \frac{\varrho_1^2}{2} \Big] ds \\
&\quad + \int_0^t \varrho_1 dB_1(t) + \theta \varepsilon \log(t+1).
\end{aligned}$$

Letting  $\epsilon$  be sufficiently small, by the definition of  $\varphi$  in (??), for sufficiently small  $\epsilon \in (0, \varrho_1^2/2 - \varphi)$ , we have

$$\begin{aligned}
\log |X(t)| &\leq \log |\xi| - \left[ \left( \frac{\varrho_1^2}{2} - \varphi \right) - \epsilon \right] t + \int_0^t \varrho_1 dB_1(t) \\
&\quad + \theta \varepsilon \log(t+1).
\end{aligned}$$

Applying the strong law of large number, we therefore have

$$\limsup_{t \rightarrow \infty} \frac{\log |X(t)|}{t} \leq -\left( \frac{\varrho_1^2}{2} - \varphi \right) + \epsilon \quad a.s.$$

□
